# Supplementary material for: Surface modification with lithium silicate to enhance the electrochemical performance of high-valence metal oxide compound MnTeMoO6
Source: Royal Society of Chemistry journal article supplement (doi:10.1039/d2ce00937d), 2022-01-01
Supplement: d2ce00937d1.pdf [file d2ce00937d1.pdf]

**Surface modification with lithium silicate to enhance electrochemical performance  
for high-valence metal oxide compound  $\text{MnTeMoO}_6$**

Xiangyan Zhao <sup>a</sup>, Bo Li <sup>a\*</sup>, Ji Zhuang <sup>a</sup>, Chao Liu <sup>a</sup>, He Zhu <sup>a</sup>, Ni Xue <sup>a</sup>, Mei Xue <sup>b</sup>, Lei  
Wang <sup>a</sup>, Xutang Tao <sup>a\*</sup>

<sup>a</sup> State Key Laboratory of Crystal Materials, School of Crystal Materials, Shandong  
University, Jinan, 250100, P. R. China.

<sup>b</sup> College of Chemistry, Chemical Engineering and Materials Science, Shandong  
Normal University, Jinan, 250014, P.R. China

\*Corresponding author:

Tel/Fax: 86-531-88364963/86-531-88574518

E-mail address: boli@sdu.edu.cn (Bo Li)

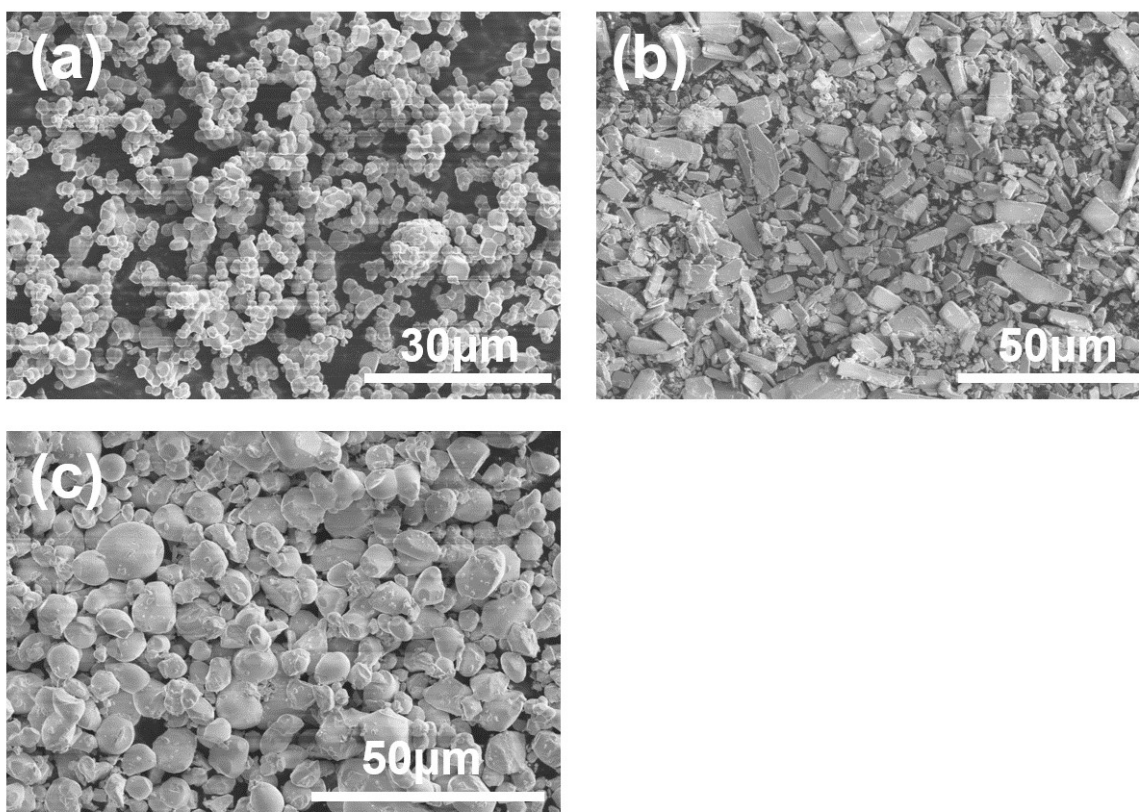

**Fig. S1.** SEM images of (a) MnO, (b) MoO<sub>3</sub> and (c) TeO<sub>2</sub>. All raw materials are bought from Shanghai Macklin Biochemical Co., Ltd. The Purity is 99.5% for MnO, 99.95% for MoO<sub>3</sub> and for 99.99% TeO<sub>2</sub>.

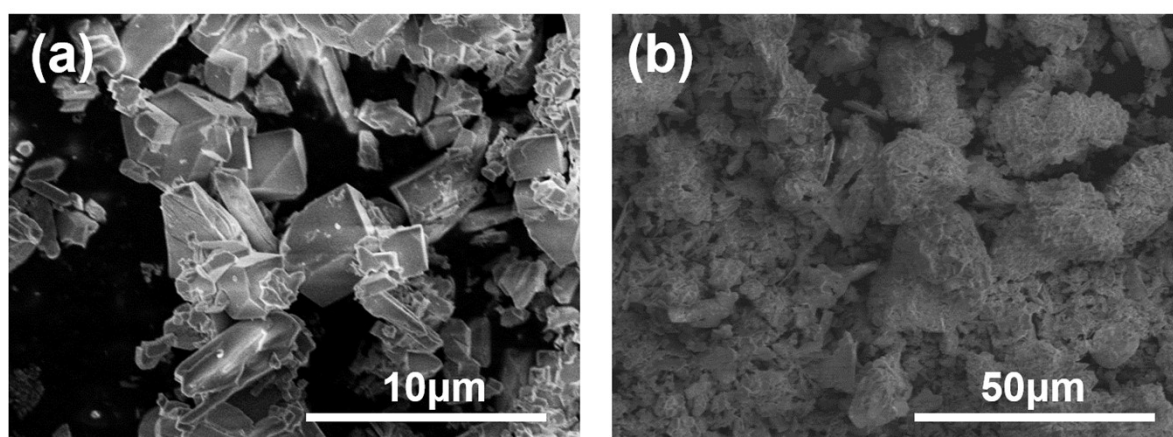

**Fig. S2.** SEM images of MnTeMoO<sub>6</sub> compound synthesized (a) in supercritical water system, and (b) by commonly-used solid state method.

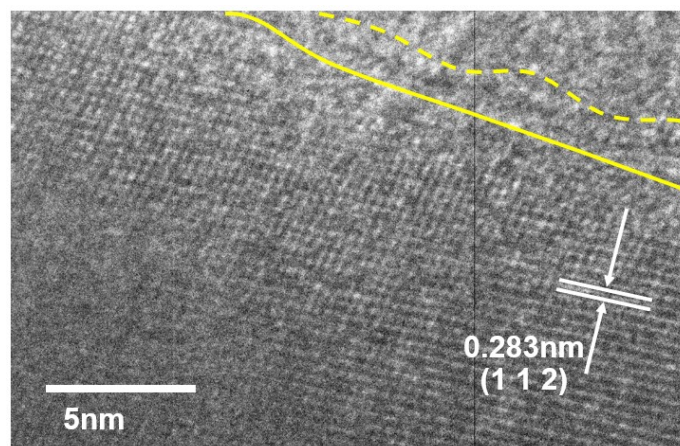

**Fig. S3.** HRTEM image of S-MnTM@LSO

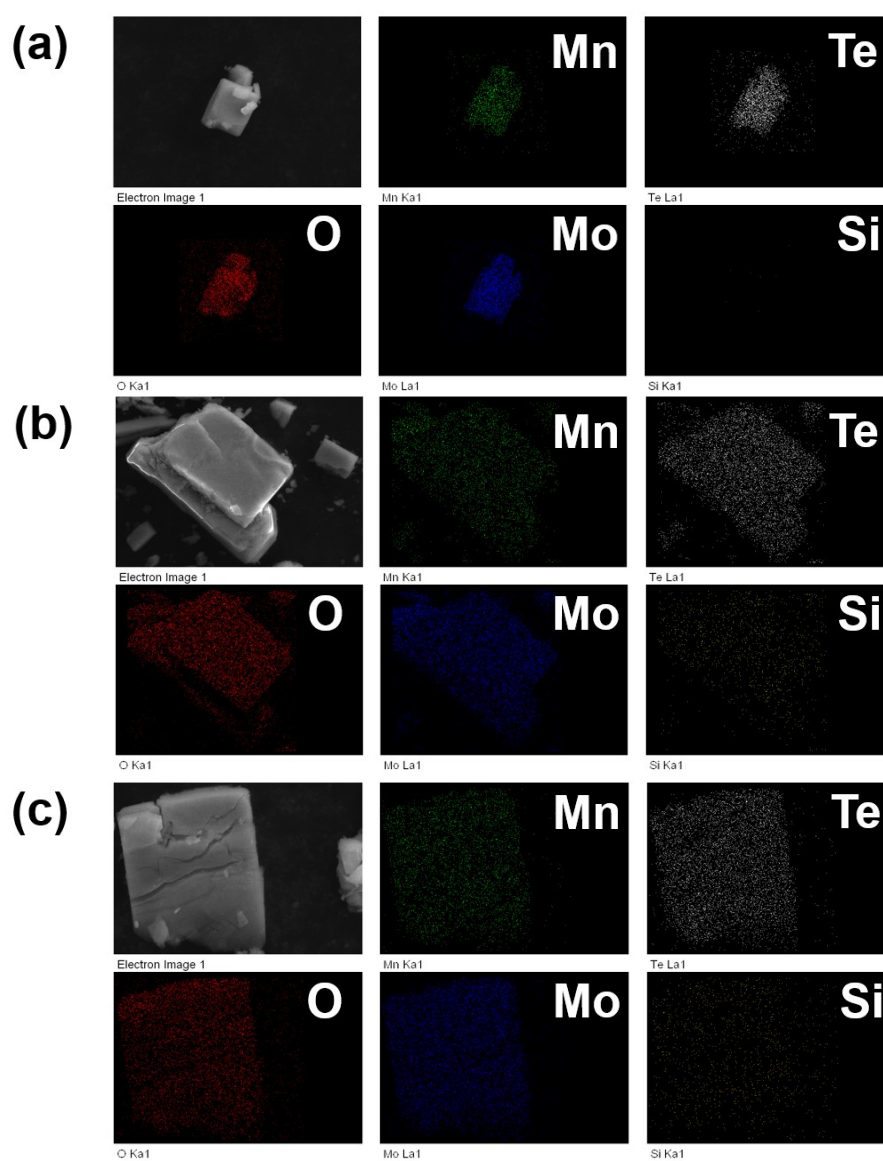

**Fig. S4.** SEM mapping images of (a) bare MnTM, (b) MnTM@LSO-1 and (c) MnTM@LSO-3.

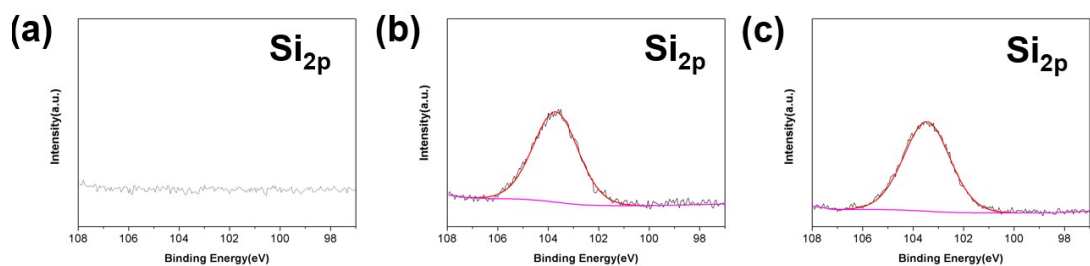

**Fig. S5.** XPS spectra of Si element of (a) bare MnTM, (b) MnTM@LSO-1 and (c) MnTM@LSO-3.

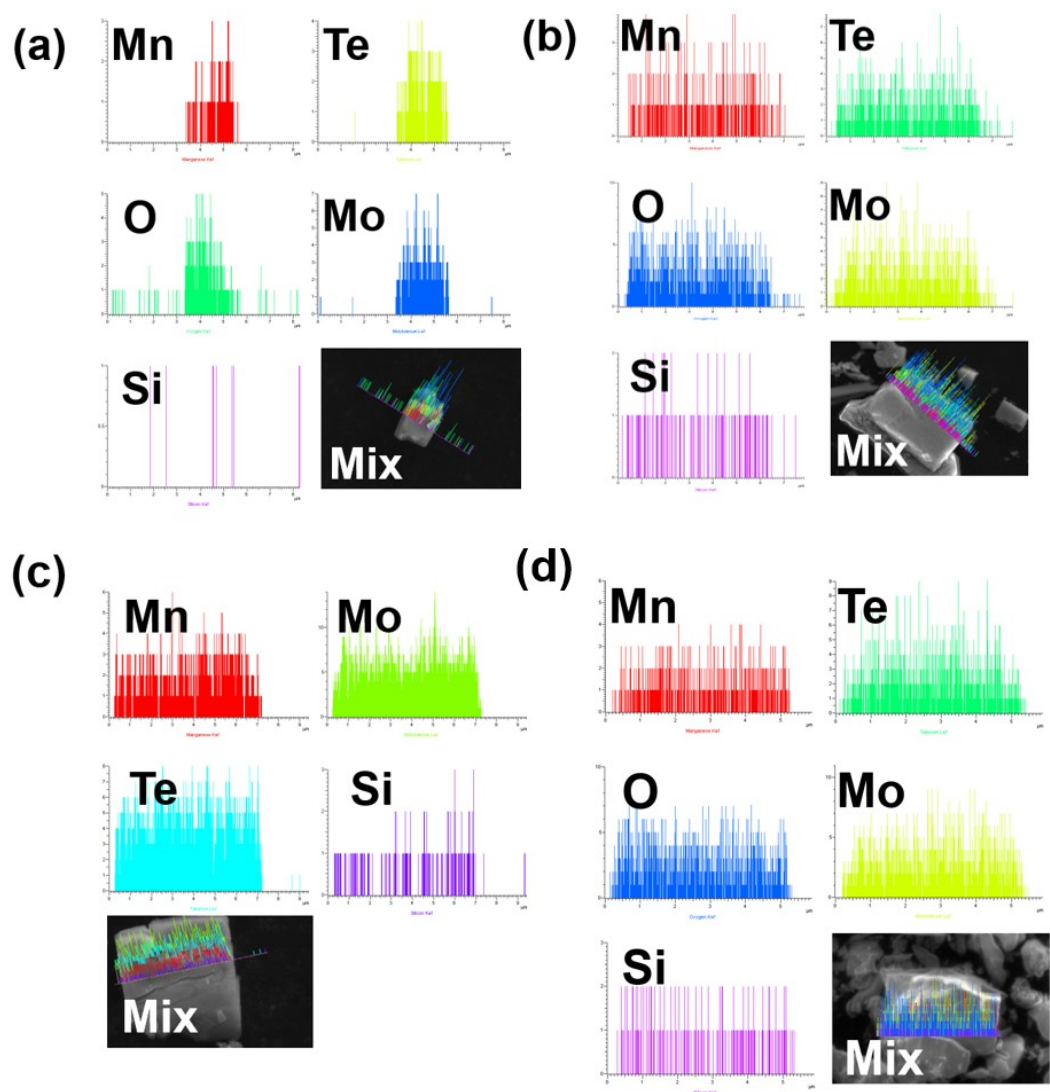

**Fig. S6.** SEM linear scanning mapping results of (a) bare MnTM, (b) MnTM@LSO-1, (c) MnTM@LSO-3 and (d) S-MnTM@LSO.

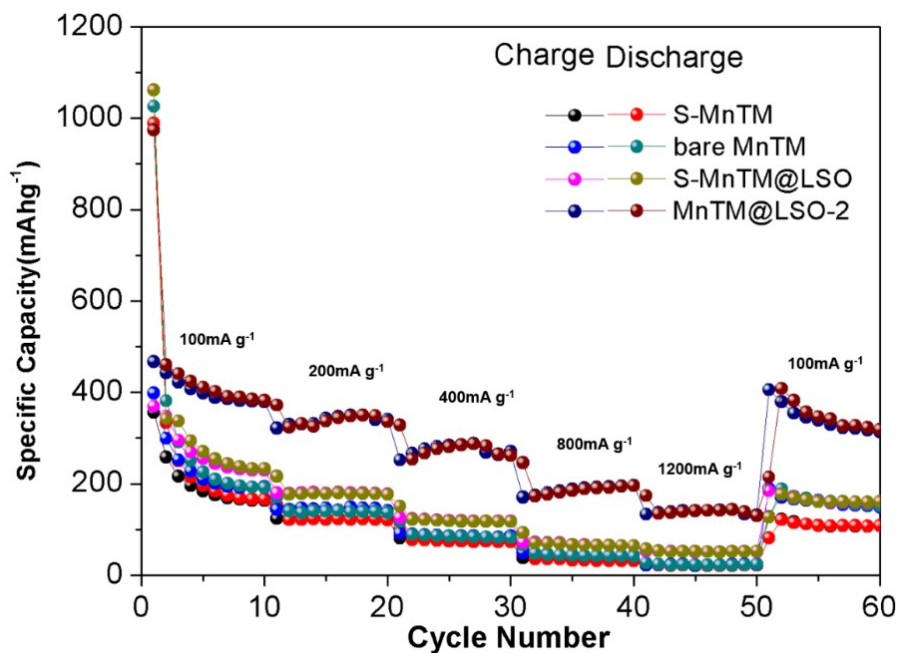

**Fig. S7.** Rate performance of MnTM composites and S-MnTM composites.

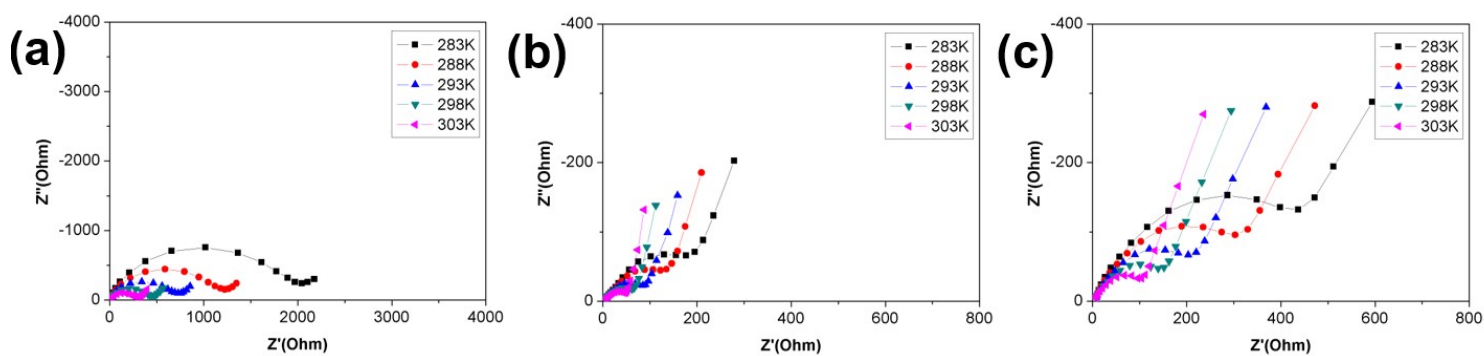

**Fig. S8.** The results of A.C. impedance test under differing temperatures. (a) Bare MnTM, (b) MnTM@LSO-1 and (c) MnTM@LSO-3.
